# Supplementary material
Source: Springer Nature journal article supplement (https://www.springermedizin.de/resource/supplementary/12974_2007_107_MOESM1_ESM.pdf/9600786)

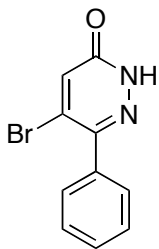

**1**

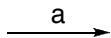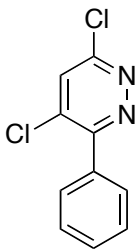

**2**

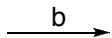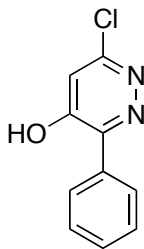

**3**

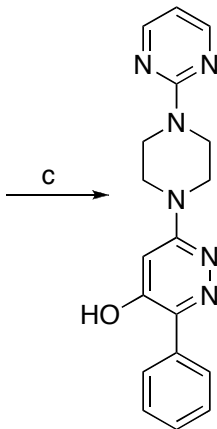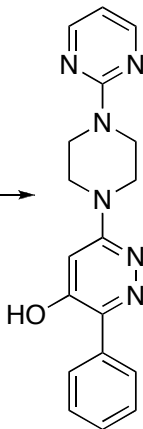

**4**

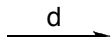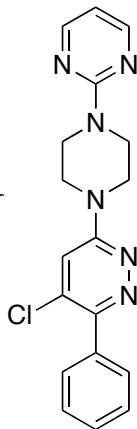

**5**

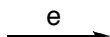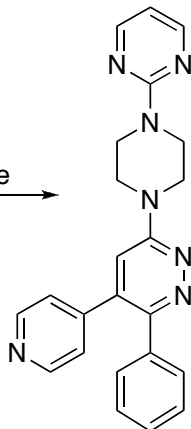

**6**

**MW01-2-069A-SRM**

Supplement: MOESM1 [file 9600786]
